Wood, E.: Editorial, *The Role of Vessel Tone in Pulmonary Hypertension*, *Circulation* 19: 641 (May) 1959.)

**HEMODYNAMICS** The hemodynamic effects of peripheral vasodilatation produced by Arfonad were studied in patients during congestive heart failure, in cardiac subjects after recovery of compensation and in noncardiac subjects. Vascular and intracardiac pressures were lowered by 20 to 30 per cent in both the systemic and pulmonary circulations. In most of the subjects with low output congestive heart failure the lowering of vascular pressures was associated with an increase in cardiac output of approximately 15 per cent. There was a concomitant increase in the oxygen content of mixed venous blood and decrease in arterio-venous oxygen difference. In noncardiac and compensated cardiac subjects the lowering of vascular pressure resulted in a decrease in cardiac output of approximately 15 per cent with a fall in oxygen content of mixed venous blood and a small rise in the arterio-venous oxygen difference. In all of the subjects there was a decrease in the excretion of water and sodium while renal hemodynamic functions changed variably and slightly. There was no difference between hypertensive and normotensive subjects. The increase in cardiac output during vasodilatation in the patients in congestive heart failure was achieved without an increase in cardiac minute or stroke work. In the noncardiac and compensated cardiac subjects minute and stroke work of the heart decreased during vasodilatation, this being due more to the fall in arterial pressure than to the decrease in cardiac output. Arfonad given intravenously in congestive heart failure produced effects similar to digitalis with respect to decreased intracardiac pressures, increased cardiac output and decreased arterio-venous oxygen difference. Following digitalis, cardiac work increased and diuresis of water and electrolytes was produced, whereas after Arfonad, cardiac work remained unaltered and water and electrolyte excretions decreased. It is not clear whether the increase in blood flow without increase in cardiac work, which follows peripheral vasodilatation by Arfonad, is beneficial to the circulation in those states where the heart is so impaired that myocardial activity cannot

be intrinsically improved. (Sobol, B. J., and others: *Cardiac, Hemodynamic and Renal Functions in Congestive Heart Failure During Induced Peripheral Vasodilatation; Relationship to Starling's Law of the Heart in Man*, *J. Clin. Invest.* 38: 557 (March) 1959.)

**BLOOD VOLUME** The theoretical and technical limitations of blood volume measurement and of determination of normal values are discussed in detail. Results in one representative sample of male medical students were a mean plasma volume of 45 ml. per kilogram and a total blood volume of 77 ml. per kilogram, with a standard deviation of about 10 per cent. The major deviations were due to differences in adiposity and this accounts for the lower blood volume characteristically seen in females. In addition, blood volume normally varies with age, bed rest, exercise, athletic training, posture, temperature, altitude and pregnancy. Abnormal reductions occur with dehydration and salt depletion. The principle result of vasomotion in the high pressure arterial system is an altered peripheral resistance. However, in the low pressure venous system, where resistance to flow is a minor factor under most circumstances, the result is a change in capacity. Thus alteration in the caliber of arteries has far less potential effect on capacity than dilatation of veins. Plasma volume can be adjusted rather quickly to compensate for sudden changes in total blood volume and moment-to-moment adjustments in plasma volume serve to maintain constant the overall blood volume. The site of adjustment is the capillary, and the rate of transcapillary exchange of fluid is so great that relatively enormous shifts in plasma volume can occur rapidly with a shift in capillary osmotic and hydrostatic forces. The vasomotor system is presumably involved to a large degree; however, large reflex changes in arterial pressure can be brought about without change in capillary pressure or plasma volume. Also pressor doses of epinephrine have inconstant or only small effects on plasma volume (dog). Changes in venous pressure, however, have marked effects on plasma volume because of their influence on capillary pressure. (Gregerson, M. I., and Rawson, R. A.: *Blood Volume*, *Physiol. Rev.* 39: 307 (April) 1959.)
